# Supplementary material for: Integrative Analysis of lncRNAs, miRNAs, and mRNA-Associated ceRNA Network in an Atopic Dermatitis Recurrence Model
Source: MDPI journal article supplement (doi:10.3390/ijms19103263), 2018-10-20
Supplement: s1 [file s1]

# Integrative Analysis of lncRNAs, miRNAs, and mRNA-Associated ceRNA Network in an Atopic Dermatitis Recurrence Model

**Table S1.** The top 10 upregulated and downregulated mRNAs in the elicitation and remission phases.

| mRNAs in Elicitation |             |            | mRNAs in Remission |             |            |
|----------------------|-------------|------------|--------------------|-------------|------------|
| GeneSymbol           | Fold Change | Regulation | GeneSymbol         | Fold Change | Regulation |
| Il19                 | 2020.955    | up         | Sprr2a2            | 6.190       | up         |
| Gm4841               | 1730.448    | up         | Klrc1              | 4.717       | up         |
| Saa3                 | 917.033     | up         | Ubash3a            | 4.670       | up         |
| Cxcl9                | 710.958     | up         | Saa3               | 3.939       | up         |
| Sprr2a2              | 561.445     | up         | Gm12250            | 3.856       | up         |
| Tdgf1                | 441.431     | up         | Gimap3             | 3.674       | up         |
| Gm12250              | 345.388     | up         | Klk1b16            | 3.646       | up         |
| Fgf23                | 208.492     | up         | Klrc1              | 3.631       | up         |
| Gsdmc                | 182.459     | up         | Cxcl10             | 3.316       | up         |
| Sell                 | 172.297     | up         | Olfr825            | 3.213       | up         |
| Gm11568              | 202.135     | down       | Olfr678            | 19.776      | down       |
| Gm11559              | 196.005     | down       | Krtap7-1           | 15.323      | down       |
| Lyg2                 | 167.089     | down       | Krtap19-4          | 10.694      | down       |
| Krtap21-1            | 123.587     | down       | Herc2              | 10.523      | down       |
| Krtap9-3             | 121.480     | down       | Krtap19-1          | 9.242       | down       |
| Adra2c               | 119.387     | down       | Ccdc175            | 8.347       | down       |
| Gm11570              | 118.620     | down       | Vmn2r88            | 7.922       | down       |
| Krtap3-1             | 113.231     | down       | Krtap22-2          | 5.998       | down       |
| 2310061N02Rik        | 110.424     | down       | Olfr1215           | 5.910       | down       |
| Krtap2-4             | 109.083     | down       | Krtap19-3          | 5.869       | down       |

**Table S2.** The top 10 upregulated and downregulated miRNAs in the elicitation and remission phases.

| miRNAs in Elicitation |             |            | miRNAs in Remission |             |            |
|-----------------------|-------------|------------|---------------------|-------------|------------|
| Name                  | Fold Change | Regulation | Name                | Fold Change | Regulation |
| mmu-miR-5127          | 19.644      | up         | mmu-miR-146a-5p     | 3.112       | up         |
| mmu-miR-465-3p        | 17.664      | up         | mmu-miR-155-5p      | 3.090       | up         |
| mmu-miR-3473b         | 16.304      | up         | mmu-miR-1902        | 3.082       | up         |
| mmu-miR-3474          | 15.643      | up         | mmu-miR-344f-5p     | 2.667       | up         |
| mmu-miR-714           | 13.159      | up         | mmu-miR-878-3p      | 2.595       | up         |
| mmu-miR-5128          | 11.535      | up         | mmu-miR-547-5p      | 2.376       | up         |
| mmu-miR-339-3p        | 10.875      | up         | mmu-miR-467b-5p     | 2.357       | up         |
| mmu-miR-1934-5p       | 10.530      | up         | mmu-miR-489-3p      | 2.239       | up         |
| mmu-miR-292a-5p       | 9.814       | up         | mmu-miR-511-3p      | 2.136       | up         |
| mmu-miR-139-5p        | 9.588       | up         | mmu-miR-382-5p      | 1.903       | up         |
| mmu-miR-99a-3p        | 0.189       | down       | mmu-miR-122-3p      | 0.377       | down       |
| mmu-miR-33-5p         | 0.248       | down       | mmu-miR-883b-5p     | 0.416       | down       |
| mmu-miR-872-5p        | 0.260       | down       |                     |             |            |

|                  |       |      |
|------------------|-------|------|
| mmu-miR-144-3p   | 0.266 | down |
| mmu-miR-31-5p    | 0.268 | down |
| mmu-miR-218-5p   | 0.287 | down |
| mmu-miR-148a-3p  | 0.310 | down |
| mmu-miR-26a-2-3p | 0.314 | down |
| mmu-miR-214-5p   | 0.315 | down |
| mmu-miR-28a-5p   | 0.319 | down |

**Table S3.** The top 10 upregulated and downregulated LncRNAs in the elicitation and remission phases.

| LncRNAs in Elicitation |             |            | LncRNAs in Remission |             |            |
|------------------------|-------------|------------|----------------------|-------------|------------|
| GeneSymbol             | Fold Change | Regulation | GeneSymbol           | Fold Change | Regulation |
| Gm11597                | 367.747     | up         | humanlincRNA0016     | 9.731       | up         |
| BC023105               | 222.588     | up         | Themis               | 5.286       | up         |
| Mx1                    | 208.465     | up         | TCR-alpha chain      | 4.246       | up         |
| Fos                    | 160.154     | up         | Gm20500              | 3.761       | up         |
| BC023105               | 137.121     | up         | AK042944             | 3.443       | up         |
| Oasl2                  | 79.501      | up         | TCR-alpha chain      | 3.412       | up         |
| Gbp2                   | 68.574      | up         | humanlincRNA0728     | 3.240       | up         |
| Gm5970                 | 67.719      | up         | humanlincRNA2331     | 3.202       | up         |
| Cd300lf                | 64.662      | up         | XLOC_018617          | 3.187       | up         |
| Cd300lf                | 64.662      | up         | XLOC_026162          | 3.122       | up         |
| AK078248               | 2.000       | down       | uc.65                | 15.499      | down       |
| humanlincRNA0488       | 2.001       | down       | XLOC_021493          | 14.527      | down       |
| DQ699600               | 2.001       | down       | AK139454             | 8.533       | down       |
| uc.7                   | 2.002       | down       | AK046482             | 6.907       | down       |
| uc.7                   | 2.002       | down       | Fam160b1             | 6.891       | down       |
| Ppm1m                  | 2.002       | down       | AK040222             | 5.894       | down       |
| Ppm1m                  | 2.002       | down       | humanlincRNA2350     | 5.571       | down       |
| AK077696               | 2.002       | down       | AK141077             | 5.466       | down       |
| AK041883               | 2.003       | down       | Accn1/Mpped2         | 5.442       | down       |
| Gm13131                | 2.003       | down       | XLOC_015762          | 5.421       | down       |
